# Supplementary material for: The Novel Tetra-Specific Drug C-192, Conjugated Using UniStac, Alleviates Non-Alcoholic Steatohepatitis in an MCD Diet-Induced Mouse Model
Source: MDPI journal article supplement (doi:10.3390/ph16111601), 2023-11-13
Supplement: s1 [file s1]

Supplementary Materials

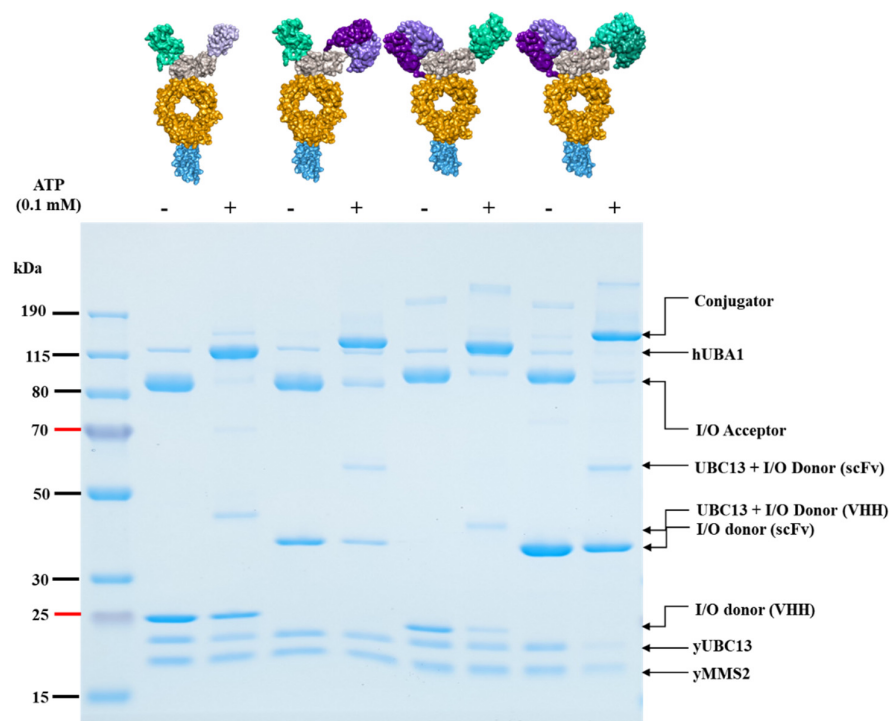

**Figure S1.** Evaluation of various formats using acceptor with Fc carrier. SDS-PAGE analysis showed that combination yield of acceptor and donor such as scFv, VHH, and cytokine through UniStac platform.
